# Supplementary material for: Surface Oxidation of Phenolic Aldehydes: Fragmentation, Functionalization, and Coupling Reactions
Source: PubMed Central journal article supplement — J Phys Chem A. 2022 Sep 7;126(37):6502–16. doi: 10.1021/acs.jpca.2c04963 (PMC9512012; doi:10.1021/acs.jpca.2c04963), 2022-09-07
Supplement: jp2c04963_si_001.pdf [file jp2c04963_si_001.pdf]

Supporting Information For:

Surface Oxidation of Phenolic Aldehydes: Fragmentation, Functionalization, and Coupling Reactions

---

*Md. Sohel Rana and Marcelo I. Guzman\**

Department of Chemistry, University of Kentucky, Lexington, Kentucky 40506, USA

\*Corresponding author's email: marcelo.guzman@uky.edu

| <b>Content</b>    | <b>Description</b>                                              | <b>Page(s)</b> |
|-------------------|-----------------------------------------------------------------|----------------|
| <b>Figure S1.</b> | Produced Areas in UHPLC-UV vs Time for Syringaldehyde Oxidation | <b>S2</b>      |

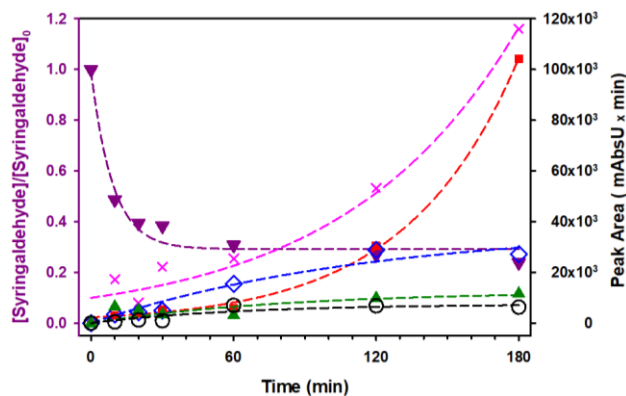

**Figure S1.** Oxidation time series for the ( $\blacktriangledown$  = peak 6, left axes) first-order decay of syringaldehyde relative to its initial value, and produced peak areas under the UHPLC UV chromatogram at  $\lambda = 210$  nm for ( $\blacksquare$  = peak 2) (2Z,4Z)-3-formyl-2,4,5-trihydroxyhexa-2,4-dienedioic acid, ( $\blacklozenge$  = peak 3) 5-hydroxyvanillin, ( $\times$  = peak 4) (Z)-5-formyl-2-(4-hydroxy-3,5-dimethoxyphenyl)-6-oxohexa-2,4-dienoic acid, ( $\blacktriangle$  = peak 5) syringic acid, and ( $\bullet$  = peak 1) = maleic acid monomethyl ester. Conditions: 207 ppmv  $O_3(g)$  at 74% RH, films extracted in isopropanol, dried, and reconstituted in water.
